# Supplementary material for: Scoping review and characteristics of publicly available checklists for assessing clinical trial feasibility
Source: BMC Med Res Methodol. 2022 May 19;22:142. doi: 10.1186/s12874-022-01617-6 (PMC9118562; doi:10.1186/s12874-022-01617-6)
Supplement: Supplementary file 2 — Additional file 2. [file 12874_2022_1617_MOESM2_ESM.xlsx]

## Sheet: Tabelle2
			Source		Source		ID				CONSENS		DATA EXTRACTION	DATA EXTRACTION	DATA EXTRACTION	DATA EXTRACTION	DATA EXTRACTION	DATA EXTRACTION	DATA EXTRACTION	DATA EXTRACTION	DATA EXTRACTION	DATA EXTRACTION	DATA EXTRACTION	DATA EXTRACTION	DATA EXTRACTION	DATA EXTRACTION	DATA EXTRACTION	DATA EXTRACTION		CHECKLIST ANALYSIS	CHECKLIST ANALYSIS	broad area>	Regulation, review and oversight	Regulation, review and oversight	Regulation, review and oversight	RECRUITMENT	RECRUITMENT	RECRUITMENT	RECRUITMENT	RECRUITMENT	RECRUITMENT	RECRUITMENT	RECRUITMENT	RECRUITMENT	RECRUITMENT	RECRUITMENT	RECRUITMENT	RECRUITMENT	RECRUITMENT
Survey on the included checklists																																own coding of the checklist item>	The clinical trial is compliant with local regulations	Safety aspects are accomodated	the study has been (independently) peer reviewed	the target population is available	eligibility criteria are clear and realistic	factors that hinder/have an impact on recruitment are known	competing trials are known	the study is interesting to others (e.g. phyisicians, co-investigators)	Routine data sources corroborate estimated recruitment rate or can facilitate recruitment	other sites are available, if necessary	the necessary number of sites is known	strategies and resources that are needed for recruitment are known	organisations and groups, relevant to recruitment, are known	The target sample size to recruit is known	how the recruitment target was calculated is known	A recruitment rate is estimated	the potential recruitment rate(s) is/are reasonable
ANSWER	Is your checklist implemented and used on a regular base?	CONTACT	Source1		Source2	pot eligible	original text > ID	inclusion? (judgement VG)	inclusion? (judgement 2nd reviewer)	comment	CONSENS	2nd reviewer	Country	Institution	Institution (short)	General purpose of the feasilbilty assessment	User (judgement)	What is the level of feasibility testing?	Is it rather a checklist or tool? (a tool requires predefined answers and generates a result of the assessment)	Is indicated based on which information the assessment has to be done? (e.g. protocol, synopsis, results of a phase 1 or 2 study or pilot/ feasibility study)?	Who interpretes and decides on the feasibility of the trial (based on reviewer judgement if not indicated by quotation marks)	Explanations how to use the tool or fill out the checklist provided?	source of explanations, if provided	Description of any (i) experience based changes of tool, (ii) user testing, or (iii) validation?	Is the tool dedicated to a specific clinical research area (e.g. children’s research)?	Which broad areas are covered? (headings as indicated in the checklist/tool)	how many areas are covered? (headings as indicated in the checklist/tool)	Can the tool be used to generate a result of the assessement?	brief description	number of items (according to our coding) inluded in the checklists	percentage of identified items included in the checklists (48 is the number of distinct items, that were identified by us)	original text from checklist>	13: Unterstützung durch Dienstleister, Regulatorische Eingaben (Ethikkommission...)./ 27: Approval pocesses will differ between sites: be prepared for delays and ask for timelines./ 18: The institution Scientific Committee will evaluate the protocol. COMBINED WITH The protocol is compatible with the local ethical practices. COMBINED WITH The protocol is compatible with the medical field, local au…	L: Appropriate approvals and safeguards are/will be in place for both clinical and non-clinical space and facilities where study activities may occur. Type and risk-level of procedures have been accounted for when selecting space and facilities. 8: Does the study involve ionising radiation or radioactive substances? ./ C: Does this trial expose the patient to radiation?....AND Do study-specific p…	8: Has te study been independently peer reviewed? C: Several persons and instances will review the trial.	L: There is a sufficient study population from which to recruit participants and the accrual goal is likely to be achieved. 8: Do you have the study population as per the inclusion criteria?/ 19: Study population targeted for in this protocol is available at investigator's site?/ 18: The targeted population is present at my site./ 17: Adequate targeted patient population?/ 1: Number of patients c…	18: The protocol admissibility criteria are realistic and well defined in the protocol./ 19: Subject eligibility criteria are realistic and well defined in the protocol./ 17: Potential complicated inclusion/exclusion criteria./	2: Are there factors that make refusal more likely (e.g. more visits than normal care?) / 19: There are protocol requirements which have an impact upon the consent of subjects to participate in the study./ 27: consider patient burden when estimating recruitment rates/ C: Are there any protocol or eligibility requirements that may limit recruitment? (e.g. rare disease)/ 8: How acceptable and attra…	2: Are there any ongoing or planned studies that could conflict with the study and limit recruitment at sites?/ 8: Are there any competing studies currently recruiting at KCH?/ 19: Investigator's institution has competing clinical studies, targeting the same population./ 18: competitive studies at my site/ 27: Any conflicting trials currently running or being set up./ C: Are there any competing p…	L: If performance sites have not yet been selected, the study is likely to solicit the interest of a sufficient number of investigators.; 2: If sites have not been pre-selected, is the study likely to be of interest to sufficient numbers of investigators? COMBINED WITH Does the study have the support/interest of the relevant clinical community, as well as any patient support groups/ charities? / …	2: What evidence is there that sufficient participants can be recruited at the proposed sites? AND Do local and regional or national patient databases exist to facilitate the identification and recruitment of participants. / 18: The number of available subjects to recruit within the time limits is confirmed (medical files, computerized listing)/ 27: gain ACCURATE estimates of how many patients ar…	2: Will participants also need to be recruited from outside the NHS (e.g. schools…)/ 18: Subjects´ availability outside my site (advertising)/ 19: The number of potential subjects outside investigator's site can be recruited according to protocol…/	2: How many sites need to be involed?./ 13: Wie viele Studienzentren werden Ihrer Meinung nach Benötigt?./	2: What strategies and resources will be needed to recruit patients? (including from other sites, if available)/ 8: How will you ensure to recruit the target within the time period stated? AND 8: How will participants be recruited? (explain logistics of how you will screen and approach eligible patients)/ 18: Subjects´ availability outside my site (advertising) 27: What methods will you use to sc…	2: Have representatives from relevant organisations relevant to the recruitment been informed and included in the study team?/ 27: consult a patient and public involvement group	8: How many participants do you aim to recruit?/ 13: What is the target sample size?/ 17: potential enrollment overall/ 1: Total number of subjects required at this site./ 27: The number of potentially eligilbe patients and how this number was calculated.	27: The number of potentially eligilbe patients and how this number was calculated./ 8: How was the recruitment target calculated?./	2: What percentage of eligible participants is likely to enrol to the study? / C: What are the lower and annual accrual goals?/ 1: Expected number of patients that will enroll in the research project. AND 1: number of patients currently diagnosed per month./ 8: How many patients per month do you need to recruit at each site to meet your target? / AND 8: How many patients do you expect to have to …	C: Are the accrual goals reasonable compared to the number of target patients?
			Internet Search		https://hub.ucsf.edu/sites/g/files/tkssra261/f/Clinical%20Trial%20Feasibility%20Checklist.pdf	yes	16	?	ex (site feasibility assessment)		ex (site feasibility assessment)	Matthias	USA	University of California San Francisco		assessment of the "capability to participate in complicance with protocol requirements"		site level/ study level (investigator perspective)		yes (synopsis, protcol, and other sponsor materials	unclear	no
Dear Viktoria, Thank you for your email. It's great that you have been able to use the below article from the CT Toolkit. I have checked with our Consultant Advisor and unfortunately we are not aware of any checklists / tools that are in the public domain We think that many organisations may have their own which aren't widely disseminated. Sorry that we could not be of more help. I wish you every…	Dear Sir or Madam I am researcher at the University Hospital Basel, Switzerland. I have included your article entitled “"Points to consider when assessing the feasibility of research" (http://www.ct-toolkit.ac.uk/routemap/feasibility-and-investigator-selection/downloads/AMRC-MCRN-Feasibility-Guide-May2011.pdf) in a systematic qualitative review. In my review we want to describe the currently avai…	http://www.ct-toolkit.ac.uk/routemap/ ; ct-toolkit@nihr.ac.uk	Internet Search	National Insitute for Health Research (Medicines for childrean research network)	http://www.ct-toolkit.ac.uk/routemap/feasibility-and-investigator-selection/downloads/AMRC-MCRN-Feasibility-Guide-May2011.pdf	yes	2	include	include		include	Matthias	UK	National Institute for Health Research	national research organization	reviewing grant proposals or checklist for the investigator ("points to consider when assessing the feasiblity of research" "For funders who review research studies to assisst in the grant review process";	funder/investigator	study	checklist	yes (grant proposal)	"researchers or funders can use the tool either alone or supported by NIHR"	no	no	no	children	clinical relevance, participant numbers, logistics at site	3	no	A list of points that can be used to think about trial feasiblity. It can be used from the investigator perspective or funder. Possible answers to the questions are not indicated / are open for the user and needed to be operationalized. Questions as they are can be answered with either yes or no or need to be answered with content (e.g. what percentage of eligible patients is likely to enrol to t…	27	56.25		0	0	0	0	0	1	1	1	1	1	1	1	1	0	0	1	0
			Internet Search		https://accrualnet.cancer.gov/sites/accrualnet.cancer.gov/files/Icahn%20School%20of%20Medicine%20at%20Mount%20Sinai.pdf	yes	7	ex (site feasibility assessment)	ex (site feasibility assessment)		ex (site feasibility assessment)	Matthias	USA	NIH, national cancer institute, AccrualNet (STRATEGIES, TOOLS AND RESOURCES TO SUPPORT ACCRUAL TO CLINICAL TRIALS)				site level (investigator perspective)		yes (protocol)	investigator	no	none	no	no	patient enrollment, protocol, staff, budgets	4	no	A checklist that can be used by the investigator to assess whether the proposed study protocol is feasible at the site and thus whether site partication from the investigator persepective seems possible. All questions have to be answered with yes or no. For some answers explanations have to be provided.
			Internet Search		https://www.thermh.org.au/research/researchers/about-research/ct-feasibility	yes	11	ex (patient recruitment tool)	ex (patient recruitment tool)		ex (patient recruitment tool)	Matthias	Australia	The Royal Melbourne Hospital		recruitment predictor		not about feasiblity assessment of an RCT
			Internet Search		https://www.uab.edu/ccts/images/Comprehensive__FEASABILITY_FORM_1-21-15.pdf	yes	14	?	ex (site feasibility assessment)		ex (site feasibility assessment)	Matthias	USA	The University of Alabama at Birmingham, center for clinica land translational science		assessment of the "capability to participate in complicance with protocol requirements"		site level (investigator perspective)		yes (synopsis, protcol, budget, and other sponsor materials	unclear
	Dear Sir or Madam I am researcher at the University Hospital Basel, Switzerland. I have included your Feasibility Checklist (https://www.kch.nhs.uk/Doc/mi%20-%20132.4%20-%20feasibility%20proforma.docx ) in a systematic qualitative review. In my review we want to describe the currently available checklists that can be used to assess the feasibility of a clinical trial during trial planning. 1) How…	https://www.kch.nhs.uk/research/setting-up/feasibility-and-review-process; "feasibility review" ; kch-tr.research@nhs.net	Internet Search		https://www.kch.nhs.uk/Doc/mi%20-%20132.4%20-%20feasibility%20proforma.docx	yes	8	include	include		include	Matthias	UK	Kings College Hospital, NHS, National Health Service foundation trust	health service facility	To be used for the departmental feasibility review of new studies. Please answer all questions below. All forms should be reviewed by a Research Facilitator before authorisation by the PI and R&I Lead	care facility/site and investigator	site/study	checklist	no	King's College on behalf of the NHS Foundation Trust	some	no	no	no	recruitment, study conduct, PI and research team, data management and equipment, regulatory aspects, tissue (for studies involving tissue), payment and funding, peer review	8	no	A checklist that can be used	28	58.3333		1	1	1	1	0	1	1	1	0	0	0	1	0	1	1	1	0
	Dear Dr. Nair I am researcher at the University Hospital Basel, Switzerland. I have included your Checklist for Study Feasibility Assessment (https://www.crc.gov.my/wp-content/uploads/documents/intranet/SOP/pre_study/SOP_R_ISR_1_02/WS-ISR-1-02-01%20Checklist%20for%20Study%20Feasibility%20Assessment.docx) in a systematic qualitative review. In my review we want to describe the currently available …	CONTACT US Dr Damenthi Nair Clinical Research Ward, Centre for Clinical Trial (CCT) Level 7, Hospital Ampang Jalan Mewah Utara, Pandan Mewah 68000 Ampang, Selangor Tel: 03-4289 6558 Fax: 03-42801409 Email: damenthi@crc.gov.my	Internet Search		https://www.crc.gov.my/wp-content/uploads/documents/intranet/SOP/pre_study/SOP_R_ISR_1_02/WS-ISR-1-02-01%20Checklist%20for%20Study%20Feasibility%20Assessment.docx	yes	19	include	include (study level/site level)		include	Matthias	Malaysia	clinical research centre, ministry of health Malaysia, institute for clinical research	national research organization		funder	site/study	checklist	no	investigator or this national research center?	no	no	no	no	scientific, technical and ethical elements, subject, personal availability, resources, facilities and equipment	5	no	A tool with questions that can be answered either with the element is available or can be fulfilled or not or the element is not applicable. The tool can be used to check the study or site level feasiblity from the funder perspective.	22	45.8333		1	0	0	1	1	1	1	0	0	1	0	0	0	0	0	0	0
			Internet Search		https://hub.ucsf.edu/sites/g/files/tkssra261/f/FeasibilityChecklist_APRIL20132013.xls	yes	10	ex (site feasibility assessment)	ex (site feasibility assessment)		ex (site feasibility assessment)	Matthias	USA	University of California San Francisco		"This tool can be used to assist investigators evaluate the feasiblity of conducting an industry sponsored study at OHSU".		site level (investigator perspective)		yes (protocol, informed consent form,case report forms, questionnaires, lab manuals, drug brochure/device manual	investigator
			Internet Search		https://www.rochester.edu/ohsp/documents/quality/word/documentationNTF/ClinicalTrialFeasibilityChecklist.docx	yes	12	ex (site feasibility assessment)	ex (site feasibility assessment)		ex (site feasibility assessment)	Matthias	USA	University of Rochester				site level (investigator perspective)
			Internet Search		https://www.researchgo.ucla.edu/sites/default/files/sites/default/FeasibilityChecklist_MAY2016.xls+&cd=10&hl=en&ct=clnk&gl=uk	yes	15	?	same as ID 16?		ex (site feasibility assessment)	Matthias	USA	UCLA		assessment of the "capability to participate in complicance with protocol requirements" and budget preparation		site level/ study level (investigator perspective)		yes (synopsis, protcol, budget, and other sponsor materials	scientific review board
			Internet Search		https://irb.upenn.edu/announcements/clinical-research-resource-feasibility-assessment-tool	yes	4	ex (site feasibility assessment)	no access	No access by direct link (Source 2)	ex (site feasibility assessment)	Beni	USA	The University of Pennsylvania Office of Clinical Research		"The University of Pennsylvania Office of Clinical Research has released a new tool for those conducting research within the Perelman School of Medicine. This tool will be required for all new investigators (the tool must be included as part of the initial application to the IRB via HS-ERA), and we strongly encourage all study teams to utilize the tool to assist in planning and ensuring appropria…		site level (investigator perspective)		no	investigator	yes (provides links to explanations or additional forms to consider)	yes	no	no	investigator self-assessment, protocol, enrollment, study team qualification/capacity, appropriate ancillary departments, equipement and space, budget, coverage analysis considerations	6	no	A checklist that can be used by an investigator to assess whether participation in a large clinical trial (usable for investigator or industry initiated) is feasible for the investigator and his team at a specific site (here: University of Pensylvenia); if applicable links are provided for more detailed information on a certain item or additional forms to consider. All questions have to answered …
	Dear Sir or Madam I am researcher at the University Hospital Basel, Switzerland. I have included your Clinical Study Feasibility Check List in a systematic qualitative review. In my review we want to describe the currently available checklists that can be used to assess the feasibility of a clinical trial during trial planning. How do you implement the check list?- for every trial?, is it mandato…	https://research.ucalgary.ca/conduct-research/ethics-compliance/quality-assurance-clinical-trials/tools-templates; research@ucalgary.ca	Internet Search		https://ucalgary.ca/research/files/research/clinical-study-feasibility-checklist.docx	yes	18	?		Wahrscheinlich fuer Site gemacht. Scheint aber auch fuer ganze Trials anwendbar	include	Beni	Canada	University of Calgary	university		investigator	site/study	checklist	no	investigator	no	no	no	no	Science, technique and ethics; subjects, personnel availability;resources;facilities and euipment	5	no		21	43.75		1	0	0	1	1	0	1	0	1	1	0	1	0	0	0	0	0
	Dear Sir or Madam I am researcher at the University Hospital Basel, Switzerland. I have included your Feasibility Review Checklist "New Clinical Trial" (https://research.unc.edu/files/2015/07/Feasibilitiy-Assessment_V03-01-2014.doc) in a systematic qualitative review. In my review we want to describe the currently available checklists that can be used to assess the feasibility of a clinical trial…	https://research.unc.edu/clinical-trials/forms/; oct@unc.edu	Internet Search		https://research.unc.edu/files/2015/07/Feasibilitiy-Assessment_V03-01-2014.doc; update: https://research.unc.edu/wp-content/uploads/sites/61/2020/04/Feasibilitiy-Assessment-V03-27-2020.doc	yes	17	?		Include	include	Beni	USA	The University of North Carolina, Office of Clinical Trials	university	Clinical Trials Quality Assurance (CTQA) Regulatory Templates; The primary purpose of OCT is to facilitate the conduct of clinical trials at UNC. In an effort to increase the volume of clinical trials performed at UNC, administrative functions have been centralized to refine procedures, improve efficiency and communication, coordinate efforts between departments and schools, and to provide accura…	investigator	site/study	checklist	no	investigator	no	no	no	no	no headings indicated	not defined (only individual questions included)	no		17	35.4167		1	0	0	1	1	0	1	1	0	0	0	0	0	1	0	1	0
	Dear Sir or Madam I am researcher at the University Hospital Basel, Switzerland. I have included your Clinical Research Feasibility Assessment Form A (https://hf.org/internal_access/clinical_research_0608.cfm) in a systematic qualitative review. In my review we want to describe the currently available checklists that can be used to assess the feasibility of a clinical trial during trial planning.…	https://hf.org/internal_access/clinical_research_0608.cfm; Clinical.Research@HF.org	Internet Search	Health First (health service facilities)	https://hf.org/internal_access/clinical_research/11_hrmc_clin_res_ops_feasibility_assessment_forma_all_v3.doc	yes	1	include		Include (relativ wenig spezifische Fragen, das Formular nennt sich aber klar "Reasability assessment form")	include	Beni	USA	Health First (health service facilities)	health service facility	reviewing a proposal by a health care facility ("initiating a new clinical research study at Health First works"; "In order to initiate clinical research in Health First facilities, investigators must ensure that ALL of the following are completed: A Health First feasibility assessment;Review and approval of the clinical research protocol and associated study materials by Western IRB; A documente…	care facility/site and investigator	site/study	checklist	yes (protocol, informed consent form, other facility specific forms etc.)	"Health First Research Administrative Liaison"	no	no	no	no	project summary, timeline, subject population, site assessment; risk and benefits of project	4	no	A checklist that has to be submitted together with other forms in case an investigator wants to include the health care facilities of "health first" in a research study. The investigator has to give qualitative information (only very few questions have to be answered with simply "yes" or "no") on the planned research (e.g. departements expected to be impacted or expected to provide services)	7	14.5833		0	0	0	1	0	0	0	0	0	0	0	0	0	1	0	1	0
			Internet Search		https://www.nwh.org/media/file/Research%20Investigator%20Forms/Clinical%20Trial%20Feasibility%20Guide.pdf	yes	9	?		? (Kein Tool, aber aehnliche Fragen wie bei den Formularen die davor eingeschlossen wurden)	ex (site feasibility assessment)	Beni	USA	Newton Wellesley Hospital, Office of Clinical Research		"to determine if the Hospital is capable of handling a clinical trial in terms of commitment of resources and it also assists in helping develop a budget. Once an investigator receives the protocol (or the protocol synopsis), the next step is to evaluate the feasiblity of actually conducting the study." "		site level/ study level (investigator perspective)		yes (protocol, or protocol synopsis)	The office of Clinical Research	no	none	no	no	patients, staff and facilities, budget, protocol, sponsor (my interpretation)	5	no	A checklist for the investigator to assess whether the hospital is capable of handling a non-investigator iniiated clinical trial.
			Internet Search		https://globalhealthtrials.tghn.org/site_media/media/medialibrary/2015/08/Site_Assessment_and_Feasibility_Questionnaire.doc	yes	6a	ex (site feasibility assessment)		ex (site feasibility assessment)	ex (site feasibility assessment)	Beni	international	Global Health Clinical Trials Programme (This web-based facility has been developed by a collaboration between many research organisations (listed below) that work in the field of global health)		site assessment		site level (?)		no	not reported, probably the sponsor	no	none	no	no	patient population and recruitment, laboratory facilities, agreements, financials, ethics committee, space and equipment, investigator profile, clinical research staff, confidentiality clause, disease profile, pre-trial feasiblity questionnaire (study specific questions, referrals, interest of PI in the study, investigator and site information, research experience of investigator, schedule of eve…	10
			Internet Search		https://globalhealthtrials.tghn.org/site_media/media/medialibrary/2015/08/Protocol_Feasibility_Assessments_SOP.docx	yes	6b	ex (site feasibility assessment)		Include (Site specific, tool am schluss scheint aber auch fuer ganze Trials anwendbar)	ex (site feasibility assessment)	Beni	international	Global Health Clinical Trials Programme (This web-based facility has been developed by a collaboration between many research organisations (listed below) that work in the field of global health)		reviewing study protocol "assessing protocol feasibility for all research studies conducted at [INSTITUTION] involving human subjects" in order to participate in a research study		site level (investigator perspective)		yes (protocol)	not reported, probably the sponsor "authority"	yes	SOPs provided	no	no	population, protocol, procedures, staff, budgets, other	6
			Internet Search		https://www.fraserhealth.ca/-/media/Project/FraserHealth/FraserHealth/Health-Professionals/Research-and-Evaluation-Services/Clinical-Research-and-Start-up-Toolkit/Clinical-research-study-completion/20170601-site-feasibility-template.doc	yes	5	ex (site feasibility assessment)		ex (site feasibility assessment)	ex (site feasibility assessment)	Beni	Canada	health authority working together with the Ministry of Health		support in setting up a clinical trial, site feasiblity questionnaire		site level (investigator perspective)		no	sponsor	no	none	no	no	investigator's experience, local ethical approval, regulatory, contract and budget contact information, patient population and recruitment	4	no	A checklist that covers detailed questions on a few aspects with the aim to help the sponsor deciding on site (i.e. Fraser Health) participation. Some questions have already been answered by Fraser Health. The checklist is tailored to Fraser Health.
			Internet Search		https://irb.research.chop.edu/study-planning-feasibility-assessment	yes	3	ex (site feasibility assessment)		ex (site feasibility assessment; not really a tool)	ex (site feasibility assessment)	Beni	USA	Children's Hospital of Philadelphia, research institute		site assessment		site level (investigator perspective)		no	investigator	no	none	no	no	time, other obligations by the investigator, funding, study procedure, contract terms, available subjects	6	yes	A checklist that covers a few brief, general questions for the investigator to consider; if any question is to be answered with "no" feasiblity is not given
			Internet Search		https://studylibfr.com/doc/143378/liste-de-v%C3%A9rification-de-la-faisabilit%C3%A9-d-un-essai-clinique	yes	20	ex (site feasibility assessment)		No access by direct link (Source 2)	ex (site feasibility assessment)	Beni	Canada					site level (investigator perspective)
Der Studienwegweiser ist implementiert in dem Sinne, dass wir die Forscher immer wieder drauf hinweisen. Darüber wie konsequent er angewendet wird kann ich nichts sagen, ich befürchte eher weniger. Und meine nächste Frage, wann plant Ihr den operational Protocol Review einzusetzen oder wurde das schon gemacht? Das war ein Projekt von Thomas Fabbro und mir, welches durch seinen Weggang leider etwa…	Email Alexandra	Email Alexandra	Internet Search	CTU Basel	https://studienwegweiser.dkfbasel.ch/print/196	yes	13	include		Include (Machbarkeitsmatrix v2)	include	Beni	Switzerland	clinica trial unit, university hospital Basel	university	"Die Abschätzung der Machbarkeit einschliesslich Budgetplanung steht bereits zu Beginn der Konzeptionsphase, da hier noch die Möglichkeit besteht, mögliche Lücken zu schliessen. Sie ist eine wesentliche Voraussetzung für den Erfolg der Studie. Der vorliegende Prozess beschreibt die verschiedenen Aspekte, die in eine Machbarkeitsabschätzung eingehen. Der Prozess schliesst mit einer schriftlichen E…	investigator	study	checklist	no	investigator	some	https://studienwegweiser.dkfbasel.ch/print/196	no	no	patient recruitment, study personal, other services required (e.g. hospital pharmacy), infrastructure & logistics	4	no	A checklists that covers 4 different aspects of feasiblity assessment and under each aspect lists several items to consider, which can be completemented by the person who fills out the checklist. The checklist can be completed by stating yes or no on a specific item or by actual numbers, if applicable (e.g. number of patients that should be included). In addition the checklist gives the possiblit…	15	31.25		1	0	0	0	0	0	0	0	0	0	1	0	0	1	0	1	0
			Internet Search	good for introduction	https://www.ncbi.nlm.nih.gov/pmc/articles/PMC3146075/	yes only by Beni	A	ex (review on trial feasiblity as concept)		ex (review on trial feasiblity as concept)	ex (review on trial feasiblity as concept)	Beni	literature					not about feasiblity assessment of an RCT
			Internet Search		https://www.ncbi.nlm.nih.gov/pmc/articles/PMC4460672/	yes only by Beni	B	ex (abstract only, no tool identified by following the indicated web link)		ex (abstract only, indicated web link to tool not working)	ex (abstract only, no tool identified by following the indicated web link)	Beni	literature					not about feasiblity assessment of an RCT
	Dear Sir or Madam I am researcher at the University Hospital Basel, Switzerland. I have included Appendix A about the Feasibility Group Questionnaire of the Feasibility Group Charter in a systematic qualitative review. In my review we want to describe the currently available checklists that can be used to assess the feasibility of a trial during trial planning. 1) How do you implement the questio…	Protocol_Activation@cancer.ufl.edu	Internet Search		https://cancer.ufl.edu/files/2018/11/Feasibility-Group-Charter-FINAL-08Nov2018_Ver2.0.pdf	yes only by Beni	C	include		include	include	Beni	USA	University of Florida, Health Cancer Center feasibilty group Clinical Research Office	health service facility	reviewing the feasiblity of a study by an institutional board; "The goal of the Feasiblity Group is to provide investigator and research team decision support to ensure adequate assessments of institutional and clinical resourcestake place as part of protocol development. ; "The UF Health Cancer Center (UFHCC) CLinical Research Office (CRO) is comitted to managing and conducting clinical trials t…	care facility/site and investigator	site/study	checklist	yes (protocol)	review board ("feasiblity group" at a care facility)	no	no	no	cancer	protocol acuity, patient population, enrollment, protocol, budget/finance, regulatory, compliance/quality assurance	7	yes		12	25		1	1	1	1	0	1	1	0	1	0	0	0	0	0	0	1	1
			Internet Search		https://trialsjournal.biomedcentral.com/articles/10.1186/1745-6215-12-S1-A113	yes only by Beni	D	ex (abstract only, only recruitment tool)		ex (abstract only, mentioned tool ("FARSITE" not found)	ex (abstract only, only recruitment tool)	Beni	literature					not about feasiblity assessment of an RCT
			Internet Search		http://www.health.act.gov.au/sites/default/files/2018-10/Canberra%20Hospital%20Feasibility%20Assessment%20Registry.xlsx	yes only by Beni	E	ex (site feasibility assessment of a registry)		ex (site feasibility assessment; however, items might be also relevant for full trial)	ex (site feasibility assessment)	Beni	Australia	Canberra hospital		feasiblity assessment of a patient registry		not about feasiblity assessment of an RCT
			Internet Search		http://palliativecare.walescancerresearchcentre.com/uploads/Toolkit/Feasibility_checklist_final_20-09-13_updated_LU_AW.pdf	yes only by Beni	F	ex (site feasibility assessment)		ex (site feasibility assessment; however, items might be also relevant for full trial)	ex (site feasibility assessment)	Beni	UK	Wales Cancer Reasearch Centre				site level (investigator perspective)
			Internet Search		https://www.uth.edu/ctrc/documents/ChecklistFeasibilityQuestionnaire.doc	yes only by Beni	G	ex (site feasibility assessment)		ex (not really a tool) Site specific, howeever, many items also relevant for full trial	ex (site feasibility assessment)	Beni	USA	University of Texas, Health Science Center at Houston, lcinical trials resource center				site level (investigator perspective)
Dear Viktoria, Thank you very much for your interest in our article. The recommended considerations for feasibility assessments in the article is a list of our own recommendations. There is some overlap with the NIHR document (reference as 36). This is an optional document which can be provided to delegates who undergo Good Clinical Practice (GCP) training sessions provided by NIHR in the UK. It …	Dear Wendy Bertam Dear Wendy Bertam I have included your article entitled "Optimising recruitment into trials using an internal pilot" published 2019 in Trials in a systematic qualitative review. In my review we want to describe the currently available checklists that can be used to assess the feasibility of a trial during trial planning. Although your article focused more on recruitment, you als…	Times Cited: 0 (from Web of Science Core Collection) ; article published in 2019! Wendy.Bertram@bristol.ac.uk	Lit Search; no free access to the reference that is mentioned; training course of the NIHR		Bertram W, Moore A, Wylde V, Gooberman-Hill R.	yes	27				include		UK	University of Bristol, Bristol Medical School	university		investigator	study	checklist	no	investigator	no	no	no	no	patient population, study sites, training equipment and materials, setup	4	no		26	54.1667		1	0	0	1	0	1	1	1	1	0	0	1	1	1	1	0	0
			update Internet Search Beni		https://irb.research.chop.edu/study-planning-feasibility-assessment		H				ex (site feasibility assessment)																5		MEDIAN	21			7	2	2	7	3	5	7	4	4	3	2	4	2	5	2	6	1
			update Internet Search Beni		https://www.nwh.org/media/file/Research%20Investigator%20Forms/Clinical%20Trial%20Feasibility%20Guide.pdf		I				ex (site feasibility assessment)																			175				175
	not done		update Internet Search Beni		https://genesisresearchservices.com/clinical-trial-feasibility-and-capacity-planning-tool/		J				ex (site feasibility assessment)
	not done		update Internet Search Beni		https://www.ohsu.edu/sites/default/files/2019-12/2019-12-12%20OCTRI%20RF%20Feasibility%20Handout%20Final.pdf		K				ex (site feasibility assessment)
	This form must be included with the initial IRB application		update Internet Search Beni		https://ictr.wisc.edu/protocol-feasibility/ https://d1uqjtzsuwlnsf.cloudfront.net/wp-content/uploads/sites/163/2019/05/SMPH- (Version used for data abstraction and analysis) Research-Feasibility-Checklist-5-28-19.docx (detailed version)		L				include		USA	University of Wisconsin-Madison, Institute for Clinical and Translational Research	university	PROTOCOL FEASIBILITY Inefficiencies in clinical research challenge the effective translation of basic discovery research into improvements in health. These inefficiencies often include an inadequate assessment of local capacity to support research projects via access to data systems, patient cohorts and other key services. When our clinical research workforce is unable to comprehensively assess p…	Investigator and Department Chair or Designee	study	checklist	yes (protocol)	investigator together with department	no		no	no	Department & Scholarly Merit; Fiscal; Personnel; Space and Facilities; Constituent Endorsement; Acceptable Clinical Practice; Recruitment; Multi-Site Investigator-Initiated Research	7	yes		13	27.0833		0	1	0	1	0	0	0	1	0	0	0	0	0	0	0	0	0
	not done		update Internet Search Beni		https://www.iths.org/wp-content/uploads/ResearchStudyFeasibilityTool_V12017Feb6.pdf		M				ex (site feasibility assessment)																			21
	not done		update Internet Search Beni		https://compass.ucsd.edu/sites/default/files/sites/default/FeasibilityChecklist_MAY2016.xls		N				ex (site feasibility assessment)																			329
																												median		21			14
																														range 7-28
[truncated: 42 more columns]
